# Supplementary material for: Aurantoside L, a New Tetramic Acid Glycoside with Anti-Leishmanial Activity Isolated from the Marine Sponge Siliquariaspongia japonica
Source: MDPI journal article supplement (doi:10.3390/md22040171), 2024-04-12
Supplement: s1 [file s1]

## Supporting Information

# Aurantoside L, a New Tetramic Acid Glycoside with Anti-Leishmanial Activity Isolated from the Marine Sponge *Siliquariaspongia japonica*

Yasumoto Oyadomari <sup>1</sup>, Yasuyuki Goto <sup>2</sup>, Keisuke Suganuma <sup>3</sup>, Shin-ichiro Kawazu <sup>3</sup>,  
Leontine E. Becking <sup>4,5</sup>,  
Nobuhiro Fusetani <sup>6</sup> and Yoichi Nakao <sup>1,6,\*</sup>

- <sup>1</sup> Department of Chemistry and Biochemistry, Graduate School of Advanced Science and Engineering, Waseda University, 3-4-1 Okubo, Shinjuku-ku, Tokyo 169-8555, Japan; yasu.10.26@ruri.waseda.jp
- <sup>2</sup> Graduate School of Agricultural and Life Science, The University of Tokyo, Bunkyo-ku, Tokyo 113-8657, Japan; aygoto@g.ecc.u-tokyo.ac.jp
- <sup>3</sup> National Research Center for Protozoan Diseases, Obihiro University of Agriculture and Veterinary Medicine, Inada-cho, Obihiro, Hokkaido 080-8555, Japan; k.suganuma@obihiro.ac.jp (K.S.); skawazu@obihiro.ac.jp (S.-i.K.)
- <sup>4</sup> Aquaculture & Fisheries Group, Wageningen University & Research, P.O. Box 338, Bode 32, 6700 AH Wageningen, The Netherlands; lisa.becking@wur.nl
- <sup>5</sup> Naturalis Biodiversity Center, Darwinweg 2, 2333 CR Leiden, The Netherlands
- <sup>6</sup> Research Institute for Science and Engineering, Waseda University, 3-4-1 Okubo, Shinjuku-ku, Tokyo 169-8555, Japan; anobu@fish.hokudai.ac.jp
- \* Correspondence: ayocha@waseda.jp; Tel.: +813-5286-3100

### Table of contents

**Figure S1.** 1D <sup>1</sup>H NMR spectrum of aurantoside L (**1**) (CD<sub>3</sub>OD, 297 K).

**Figure S2.** 1D <sup>13</sup>C NMR spectrum of aurantoside L (**1**) (CD<sub>3</sub>OD, 297 K).

**Figure S3.** DEPT-135 spectrum of aurantoside L (**1**) (CD<sub>3</sub>OD, 297 K).

**Figure S4.** 2D <sup>1</sup>H-<sup>1</sup>H COSY of aurantoside L (**1**) (CD<sub>3</sub>OD, 297 K).

**Figure S5.** 2D <sup>1</sup>H-<sup>1</sup>H COSY of aurantoside L (**1**) in the range from 6.0 to 8.0 ppm (CD<sub>3</sub>OD, 297 K).

**Figure S6.** 2D <sup>1</sup>H-<sup>13</sup>C HMQC HMQC spectrum of aurantoside L (**1**) (CD<sub>3</sub>OD, 297 K).

**Figure S7.** 2D <sup>1</sup>H-<sup>13</sup>C HMQC HMBC spectrum of aurantoside L (**1**) (CD<sub>3</sub>OD, 297 K).

**Figure S8.** 2D <sup>1</sup>H-<sup>1</sup>H NOESY spectrum of aurantoside L (**1**) (CD<sub>3</sub>OD, 297 K).

**Figure S9.** 1D <sup>1</sup>H NMR spectrum of aurantoside L (**1**) (CD<sub>3</sub>OD, 320 K).

**Figure S10.** 1D <sup>13</sup>C NMR spectrum of aurantoside L (**1**) (CD<sub>3</sub>OD, 320 K).

**Figure S11.** DEPT-135 spectrum of aurantoside L (**1**) (CD<sub>3</sub>OD, 320 K).

**Figure S12.** 2D <sup>1</sup>H-<sup>1</sup>H COSY spectrum of aurantoside L (**1**) (CD<sub>3</sub>OD, 320 K).

**Figure S13.** 2D <sup>1</sup>H-<sup>13</sup>C HMQC HMQC spectrum of aurantoside L (**1**) (CD<sub>3</sub>OD, 320 K).

**Figure S14.** 2D <sup>1</sup>H-<sup>13</sup>C HMQC HMBC spectrum of aurantoside L (**1**) (CD<sub>3</sub>OD, 320 K).

**Figure S15.** 2D  $^1\text{H}$ - $^1\text{H}$  NOESY spectrum of aurantoside L (**1**) ( $\text{CD}_3\text{OD}$ , 320 K).

**Figure S16.** 1D  $^1\text{H}$  NMR spectrum of aurantoside L (**1**) ( $\text{CD}_3\text{COCD}_3$ , 297 K).

**Figure S17.** 2D  $^1\text{H}$ - $^1\text{H}$  NOESY spectrum of aurantoside L (**1**) ( $\text{CD}_3\text{COCD}_3$ , 297 K).

**Figure S18.** ESIMS of aurantoside L (**1**) (positive mode).

**Figure S19.** ESIMS/MS of aurantoside L (**1**) (positive mode, collision energy = 40 eV, precursor ion =  $m/z$  865.2).



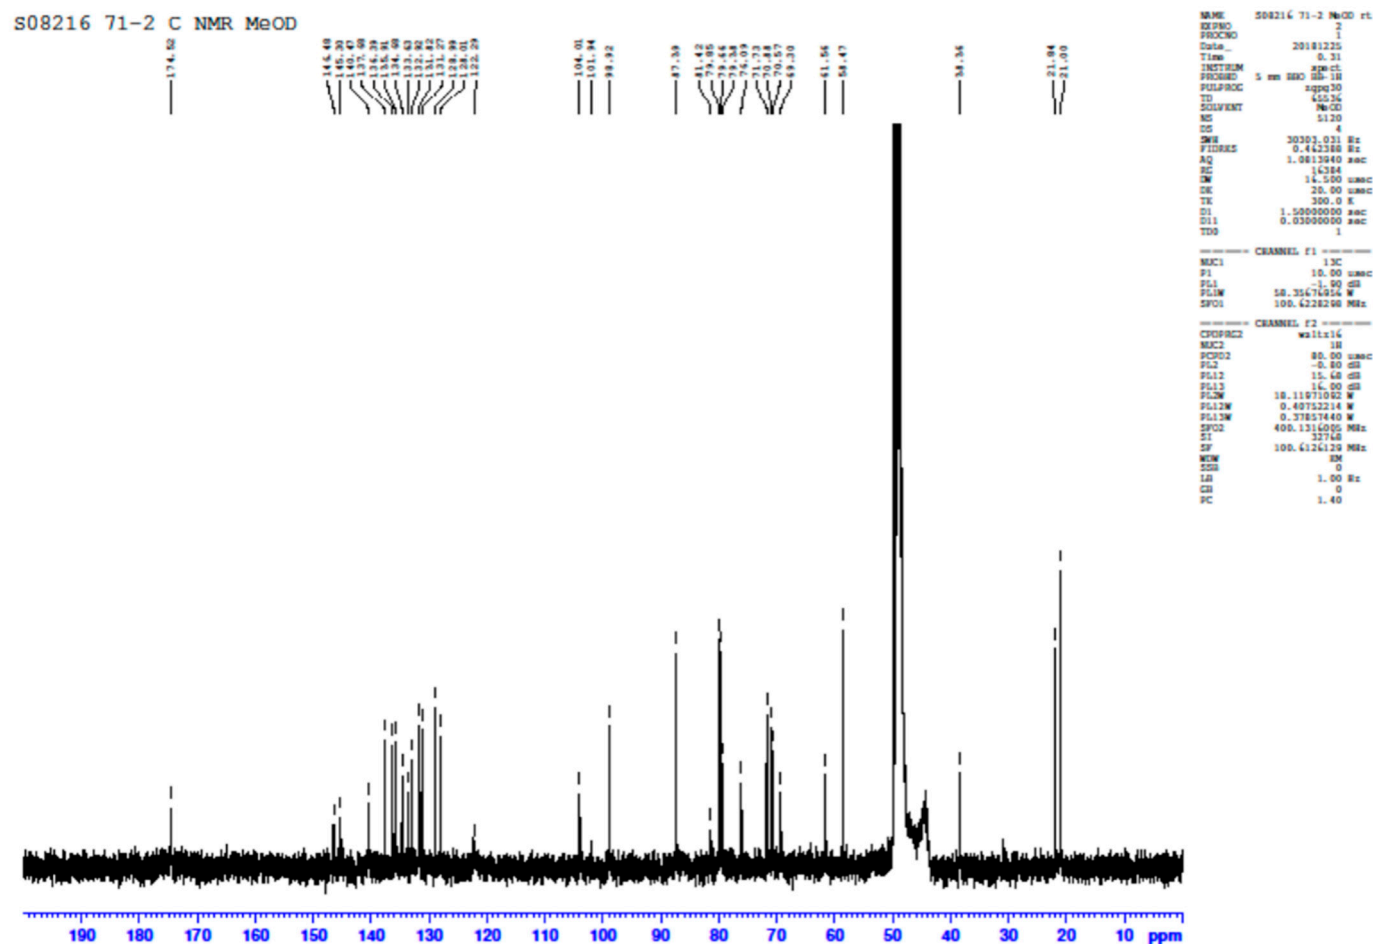

Figure S2. 1D  $^{13}\text{C}$  NMR spectrum of auranoside L (1) ( $\text{CD}_3\text{OD}$ , 297 K).

s08216 71-2 DEPT135 MeOD

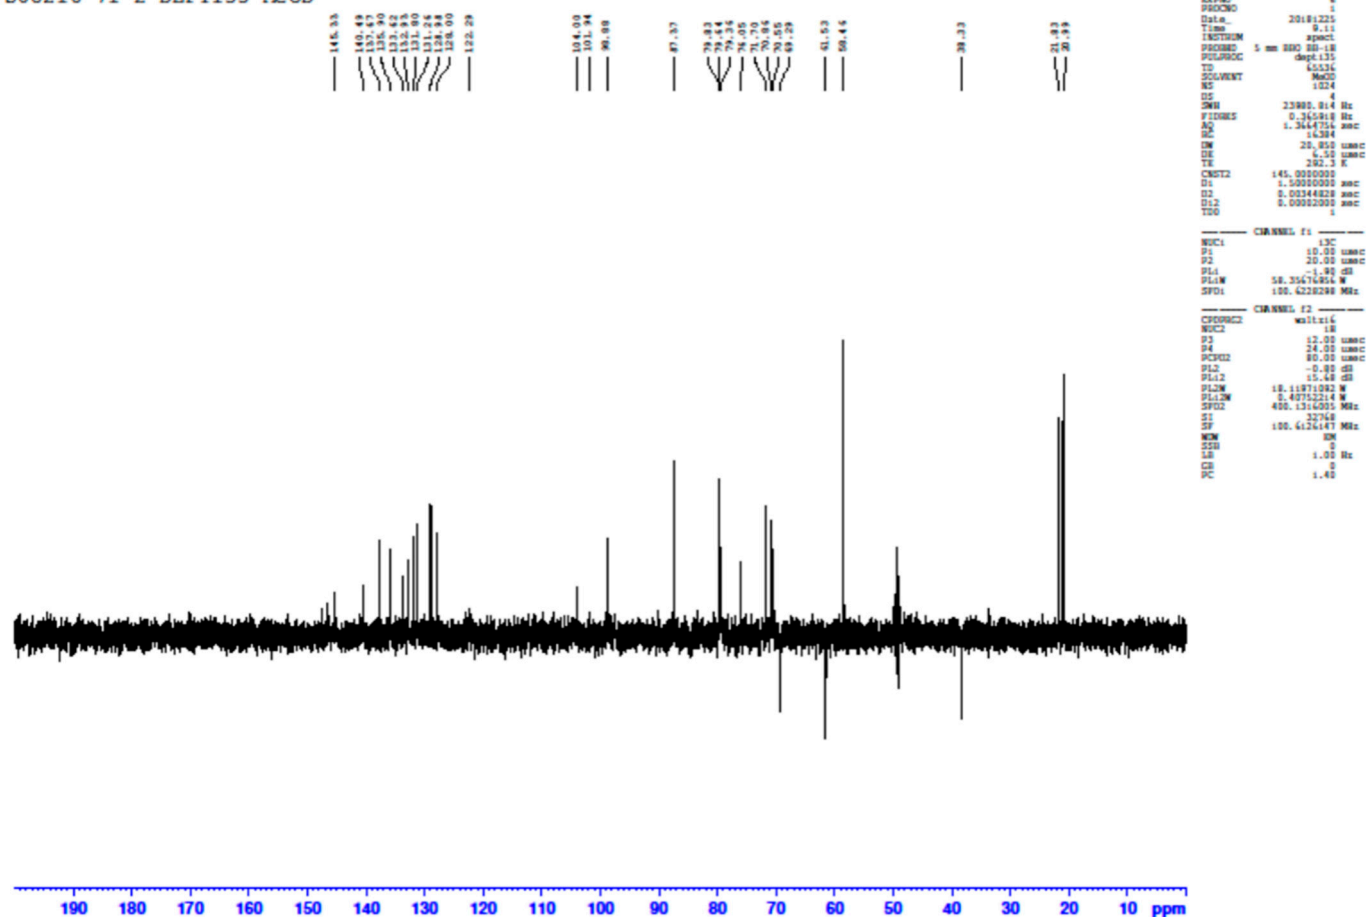

Figure S3. DEPT-135 spectrum of aurantoside L (1) (CD<sub>3</sub>OD, 297 K).

S08216 71-2 COSY MeOD

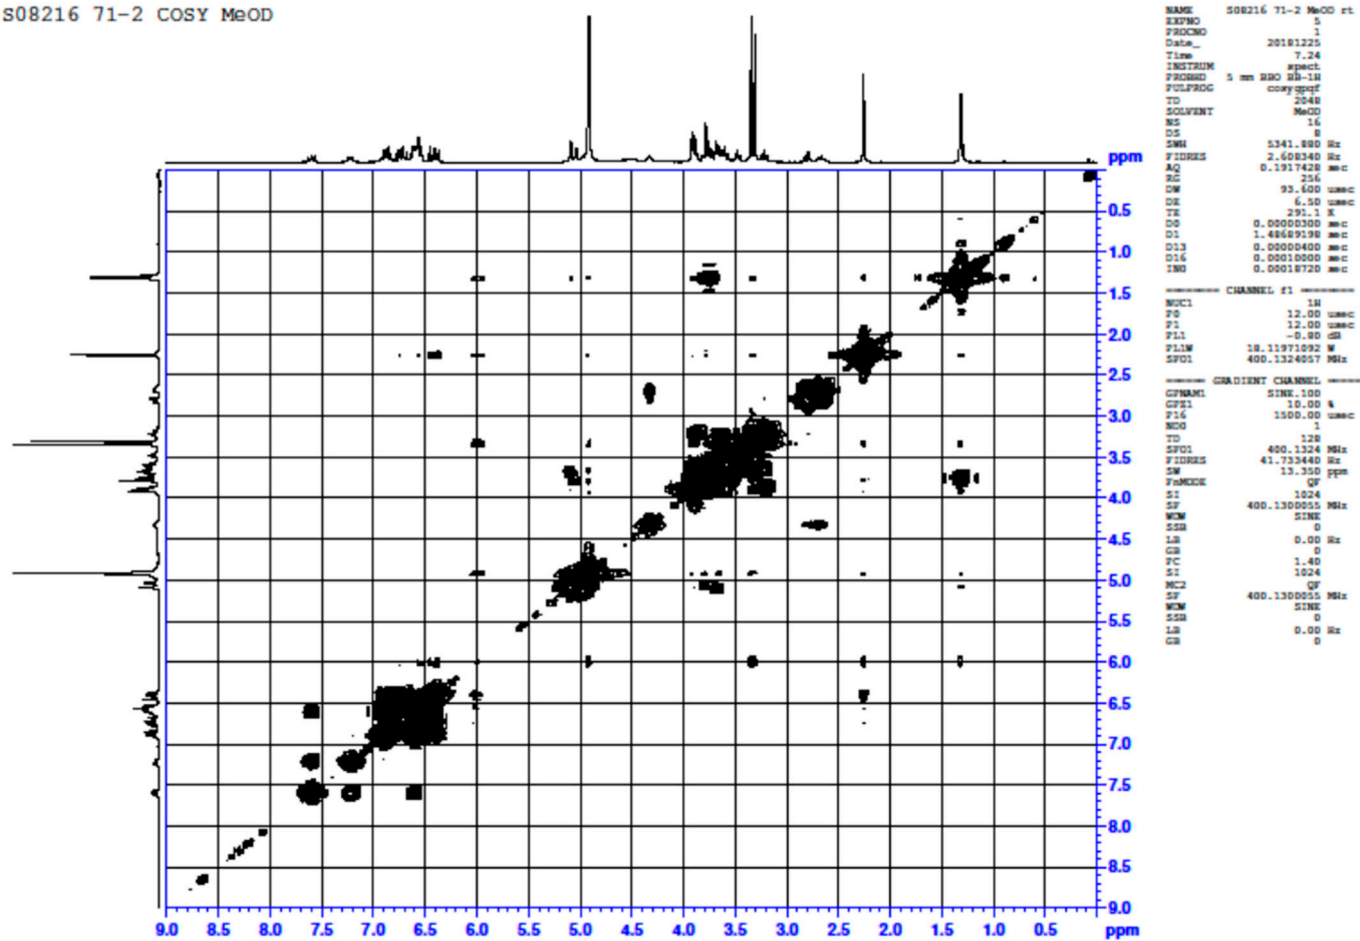

Figure S4. 2D  $^1\text{H}$ - $^1\text{H}$  COSY spectrum of auranoside L (1) ( $\text{CD}_3\text{OD}$ , 297 K).

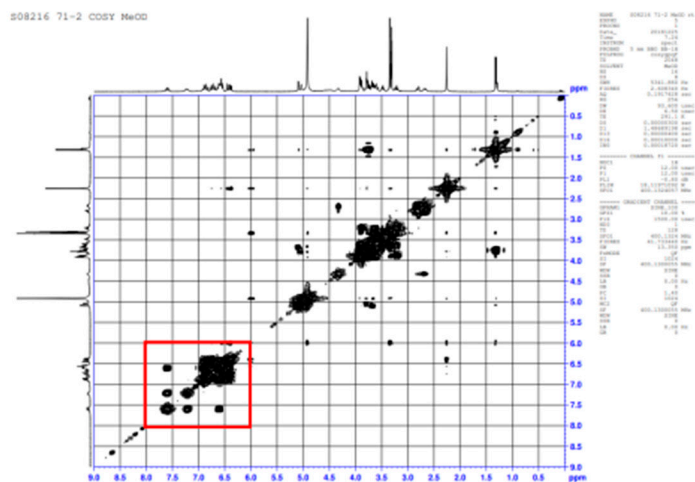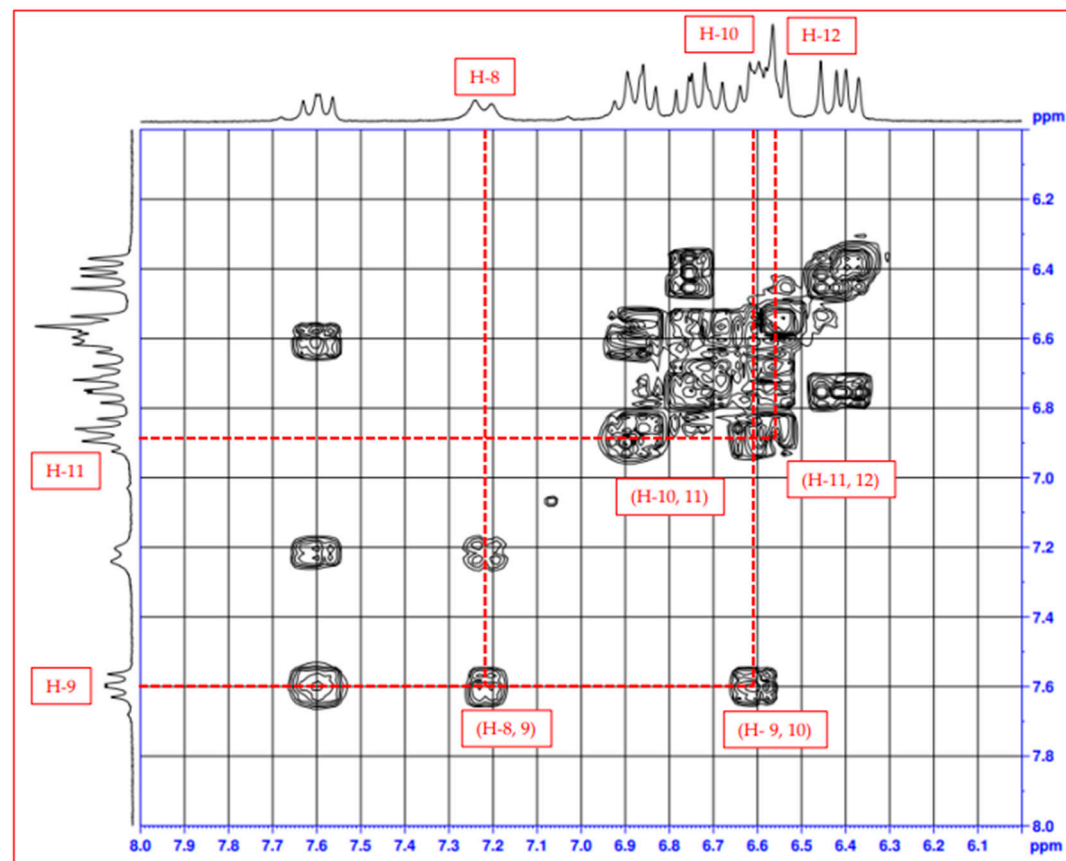

**Figure S5.** 2D  $^1\text{H}$ - $^1\text{H}$  COSY spectrum of aurantoside L (**1**) in the range from 6.0 to 8.0 ppm ( $\text{CD}_3\text{OD}$ , 297 K).

s08216 71-2 HMQC MeOD rt

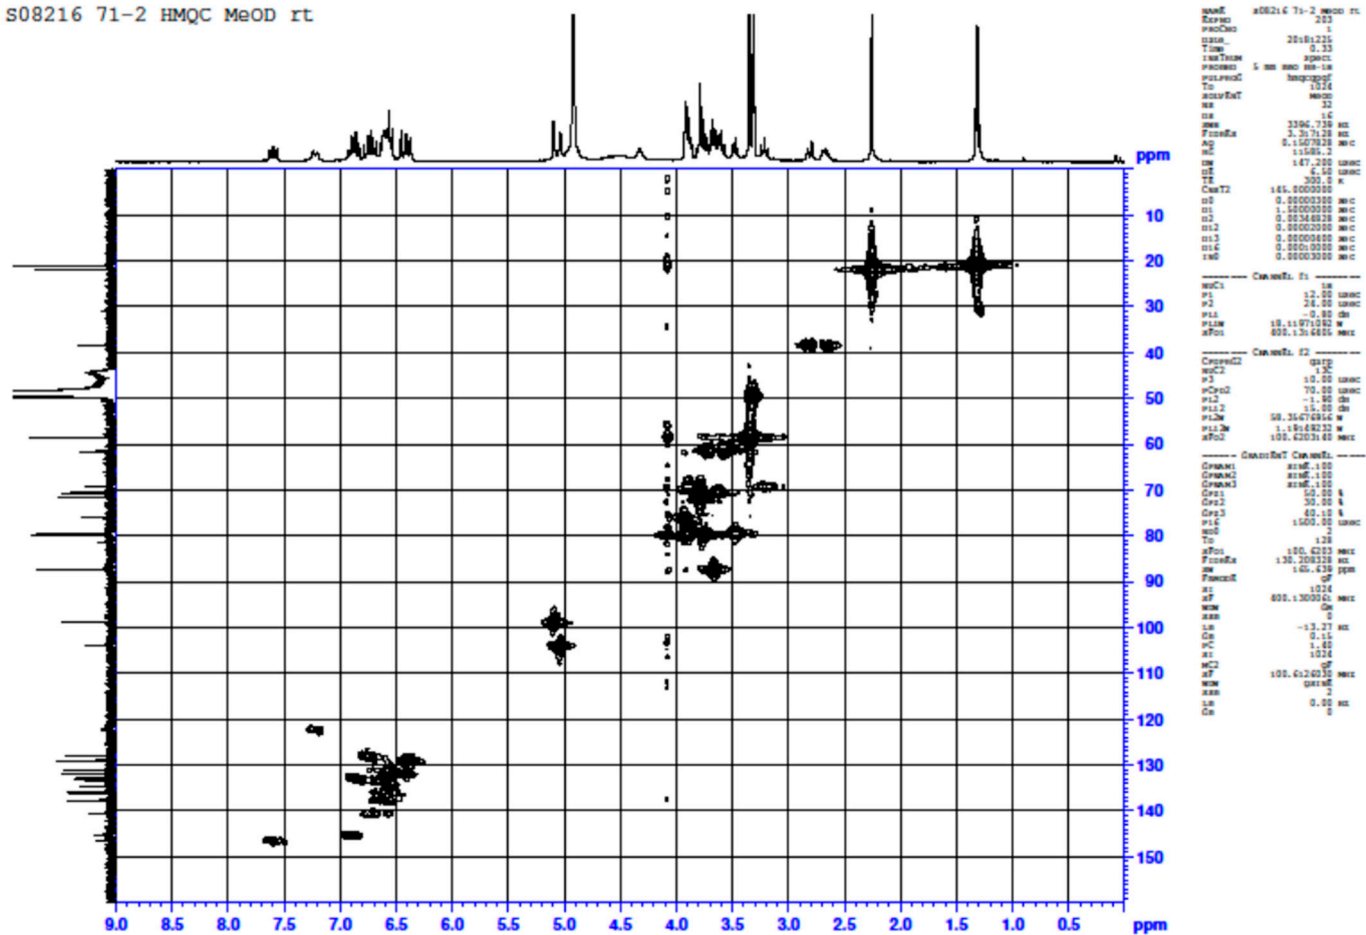

Figure S6. 2D  $^1\text{H}$ - $^{13}\text{C}$  HMQC spectrum of auranoside L (1) ( $\text{CD}_3\text{OD}$ , 297 K).



s08216 71-2 HMBC MeOD rt

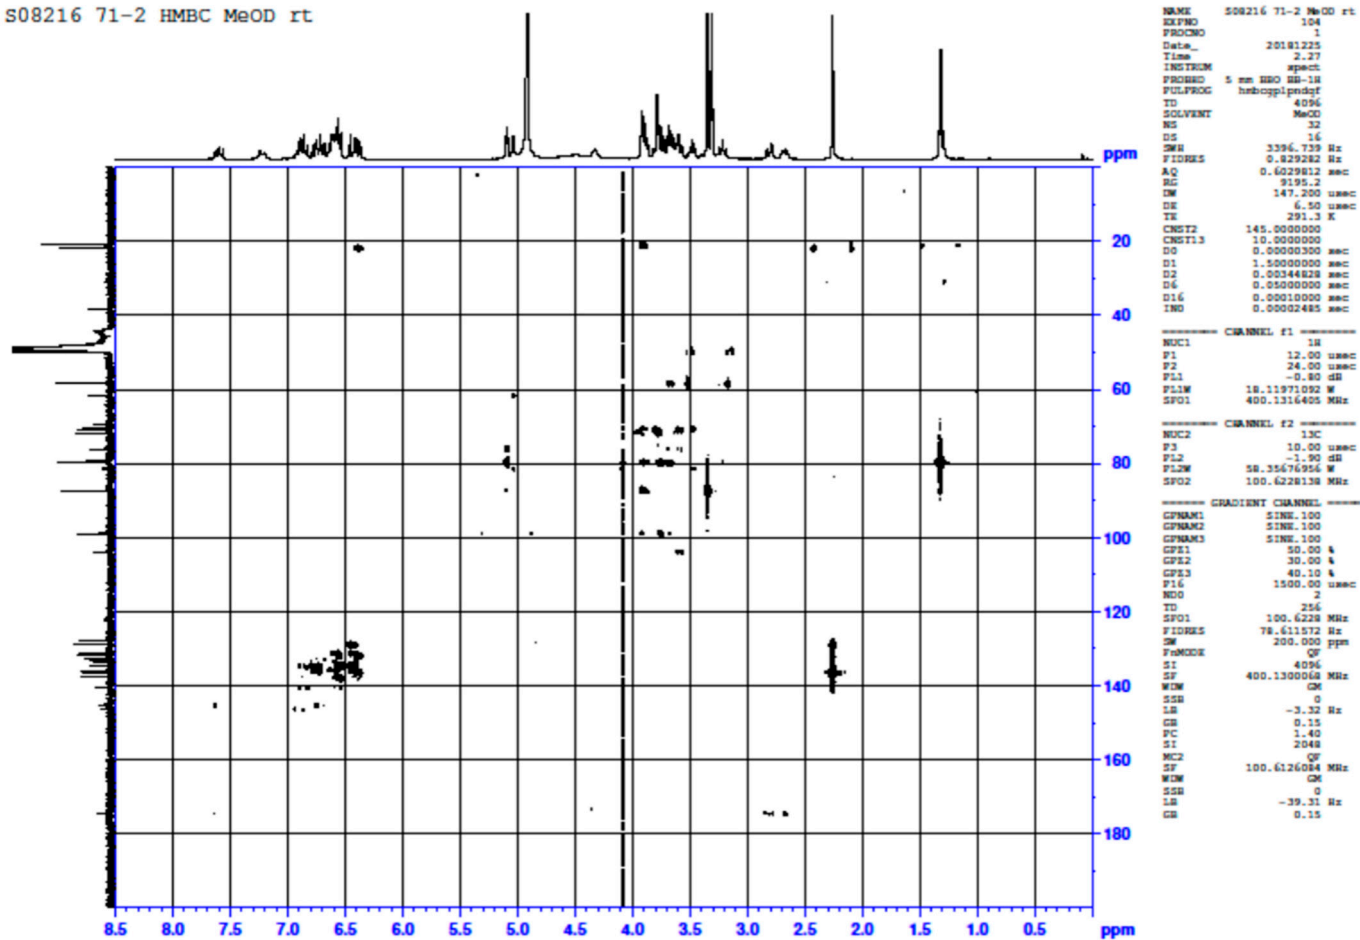

Figure S7. 2D  $^1\text{H}$ - $^{13}\text{C}$  HMBC spectrum of aurantoside L (**1**) ( $\text{CD}_3\text{OD}$ , 297 K).

S08216 71-2 NOESY MeOD

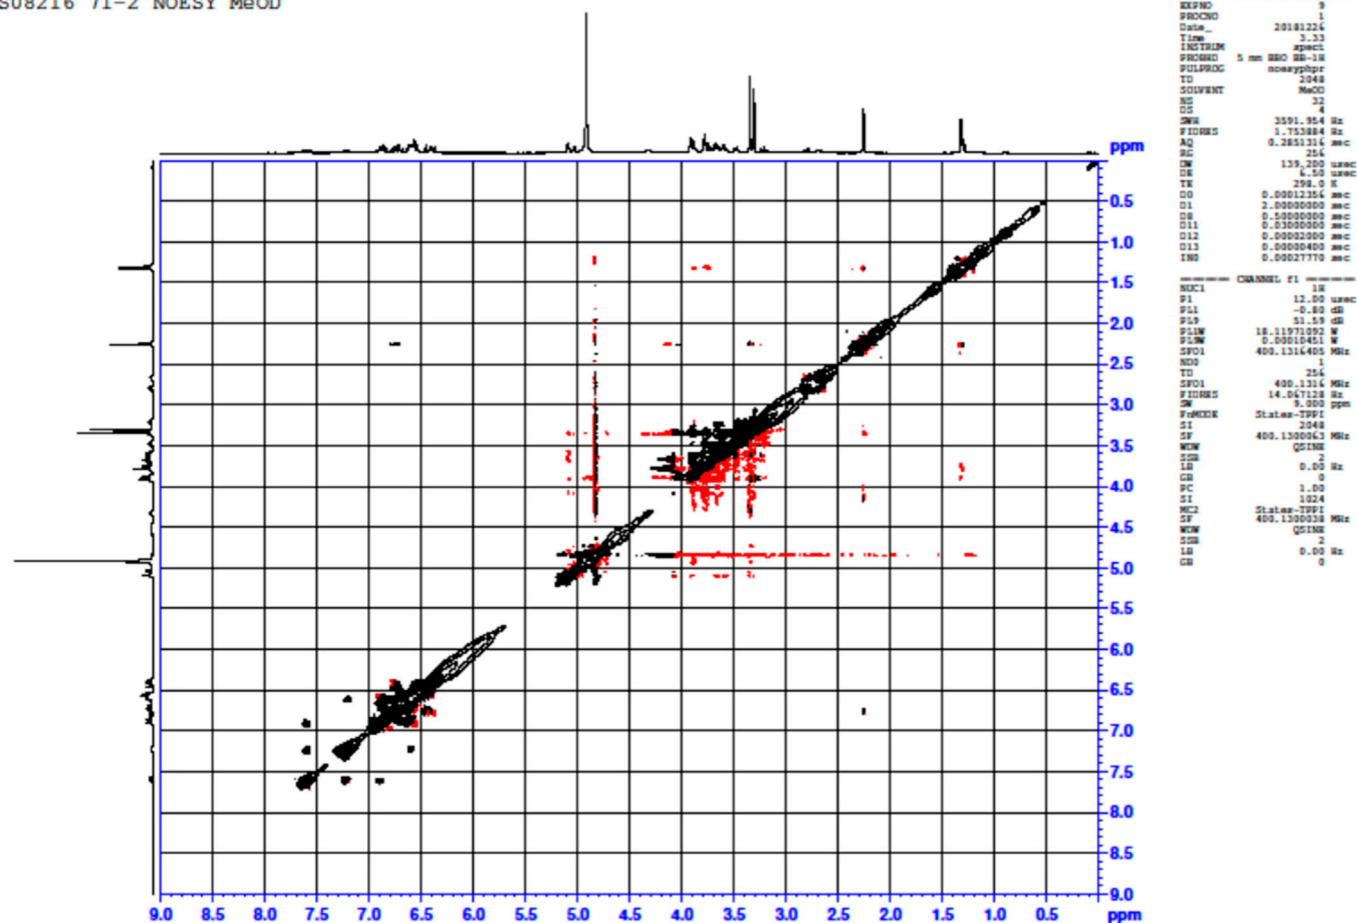

Figure S8. NOESY spectrum of auranoside L (1) (CD<sub>3</sub>OD, 297 K).

S08216 71-2 H NMR MeOD 320K

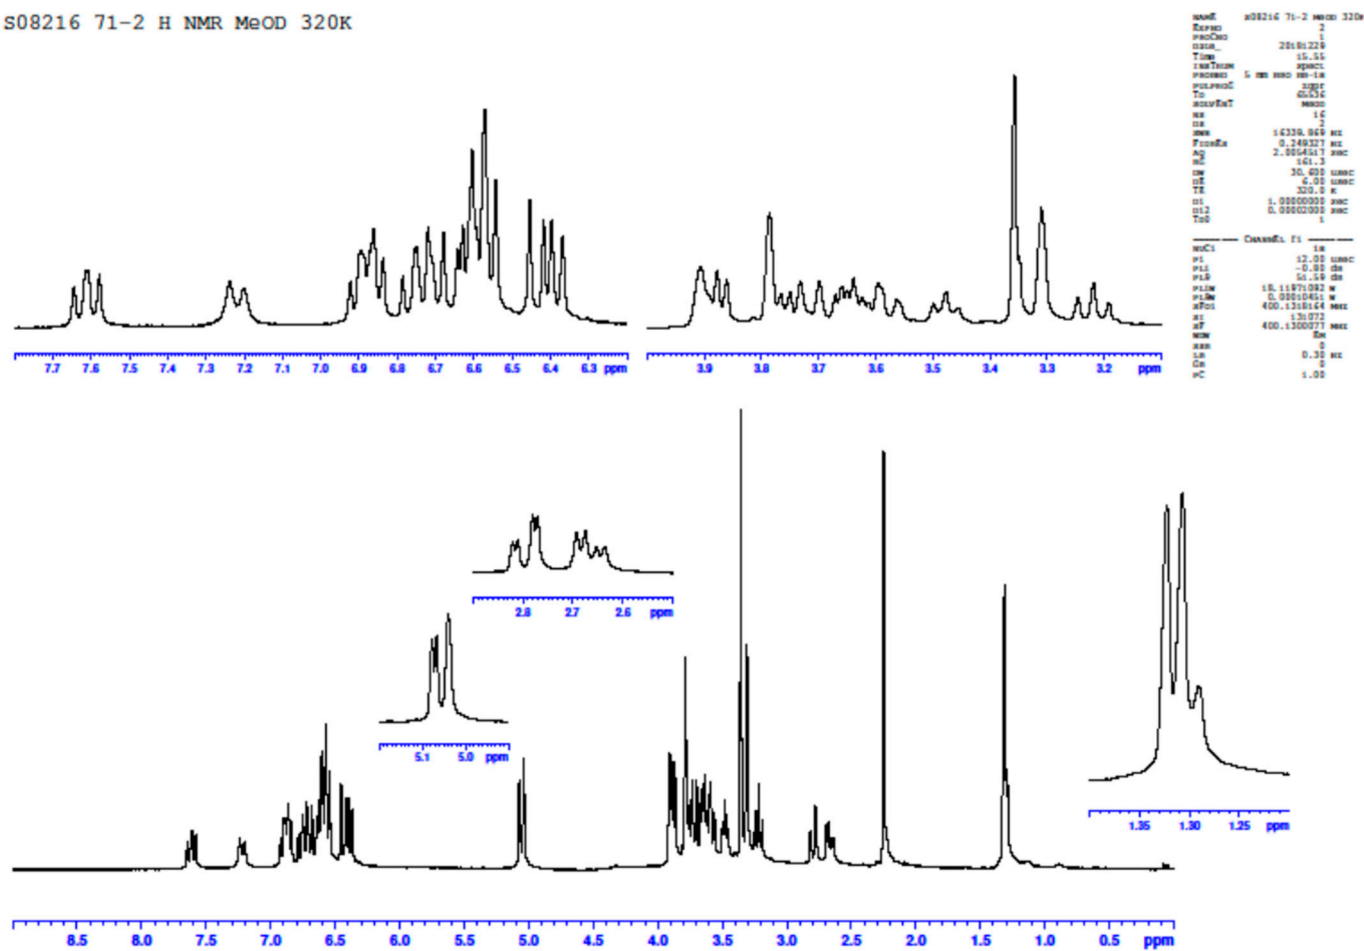

Figure S9. 1D  $^1\text{H}$  NMR spectrum of aurantoside L (1) ( $\text{CD}_3\text{OD}$ , 320 K).

S08216 71-2 C NMR MeOD 320K

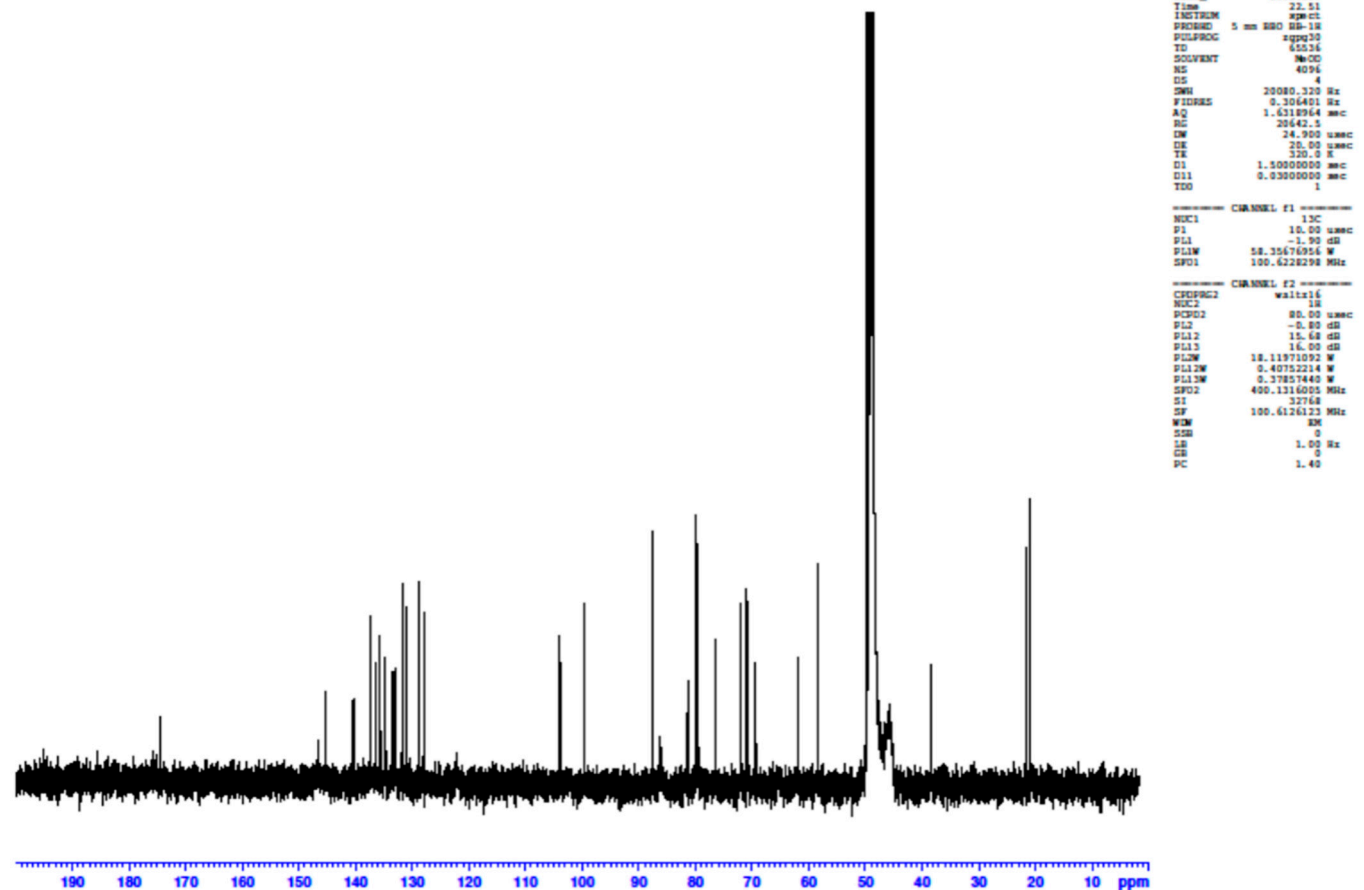

Figure S10. 1D  $^{13}\text{C}$  NMR spectrum of auranoside L (1) ( $\text{CD}_3\text{OD}$ , 320 K).

S08216 71-2 DEPT135 MeOD 320K

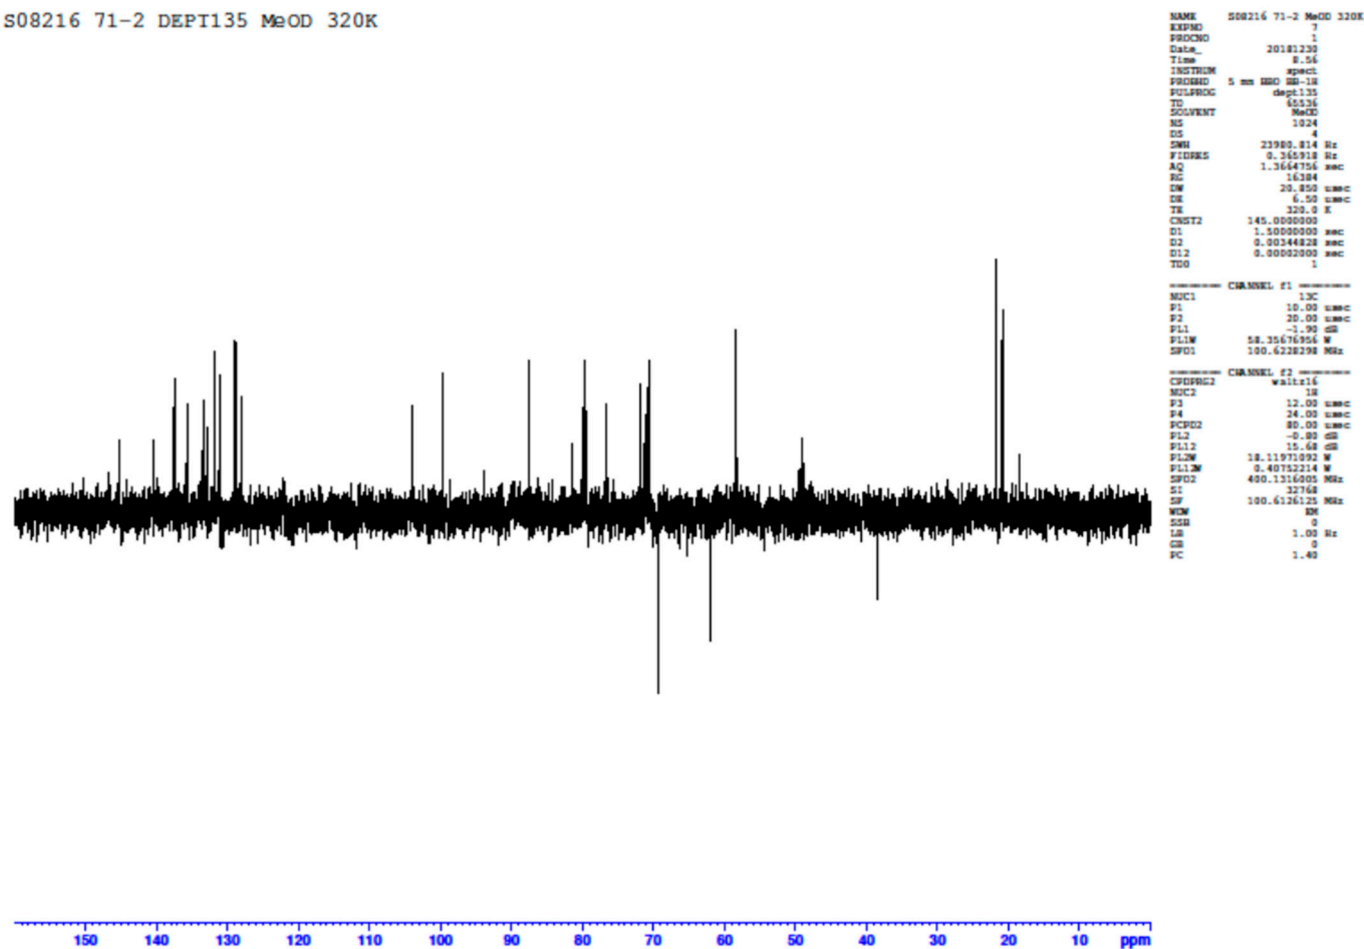

Figure S11. DEPT-135 spectrum of auranoside L (1) (CD<sub>3</sub>OD, 320 K).

S08216 71-2 COSY MeOD 320K

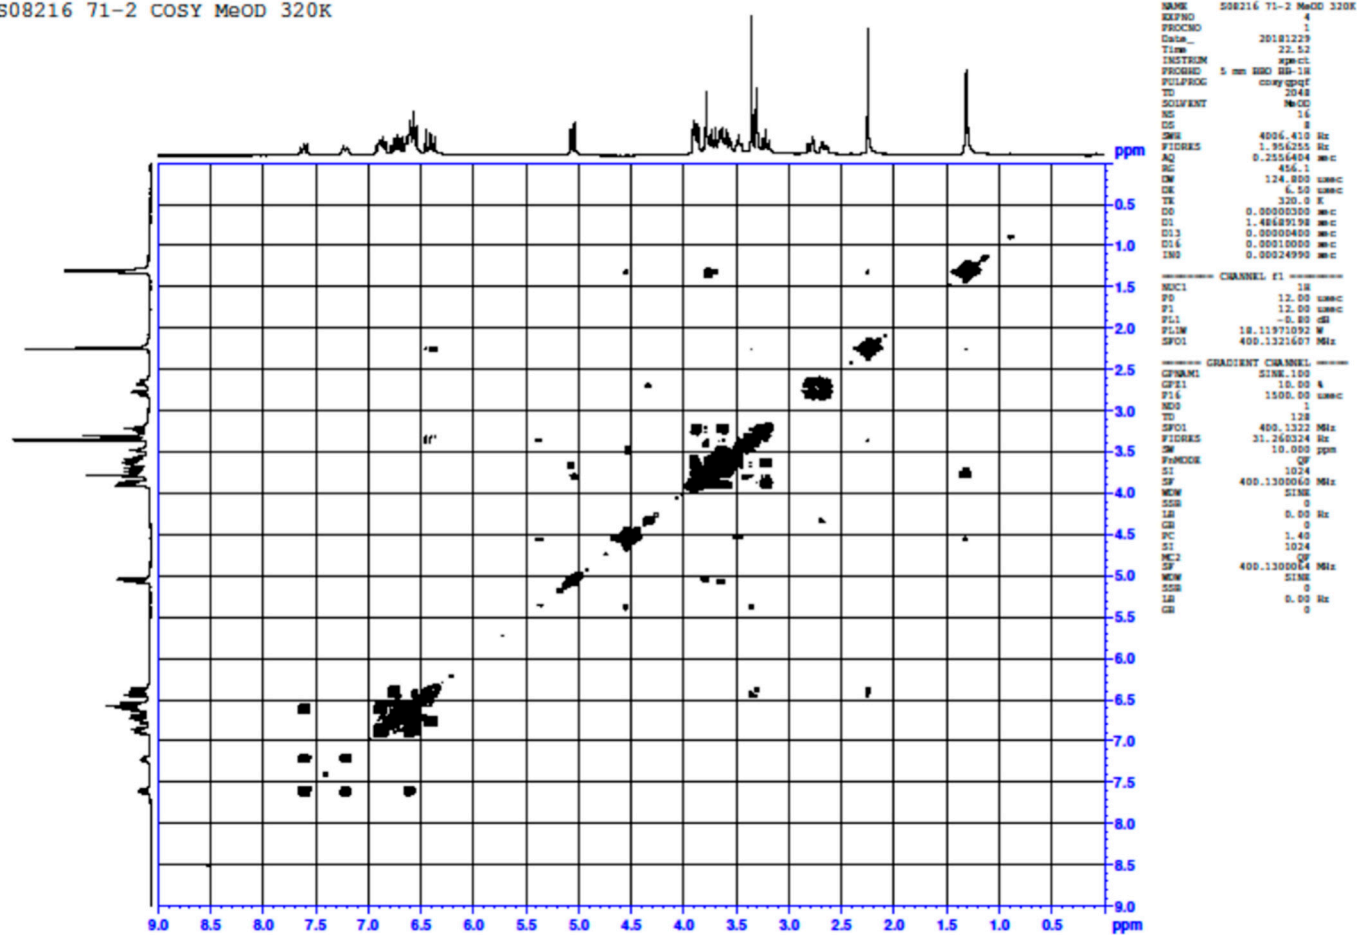

Figure S12. 2D  $^1\text{H}$ - $^1\text{H}$  COSY spectrum of auranoside L (1) ( $\text{CD}_3\text{OD}$ , 320 K).

S08216 71-2 HMQC MeOD 320K

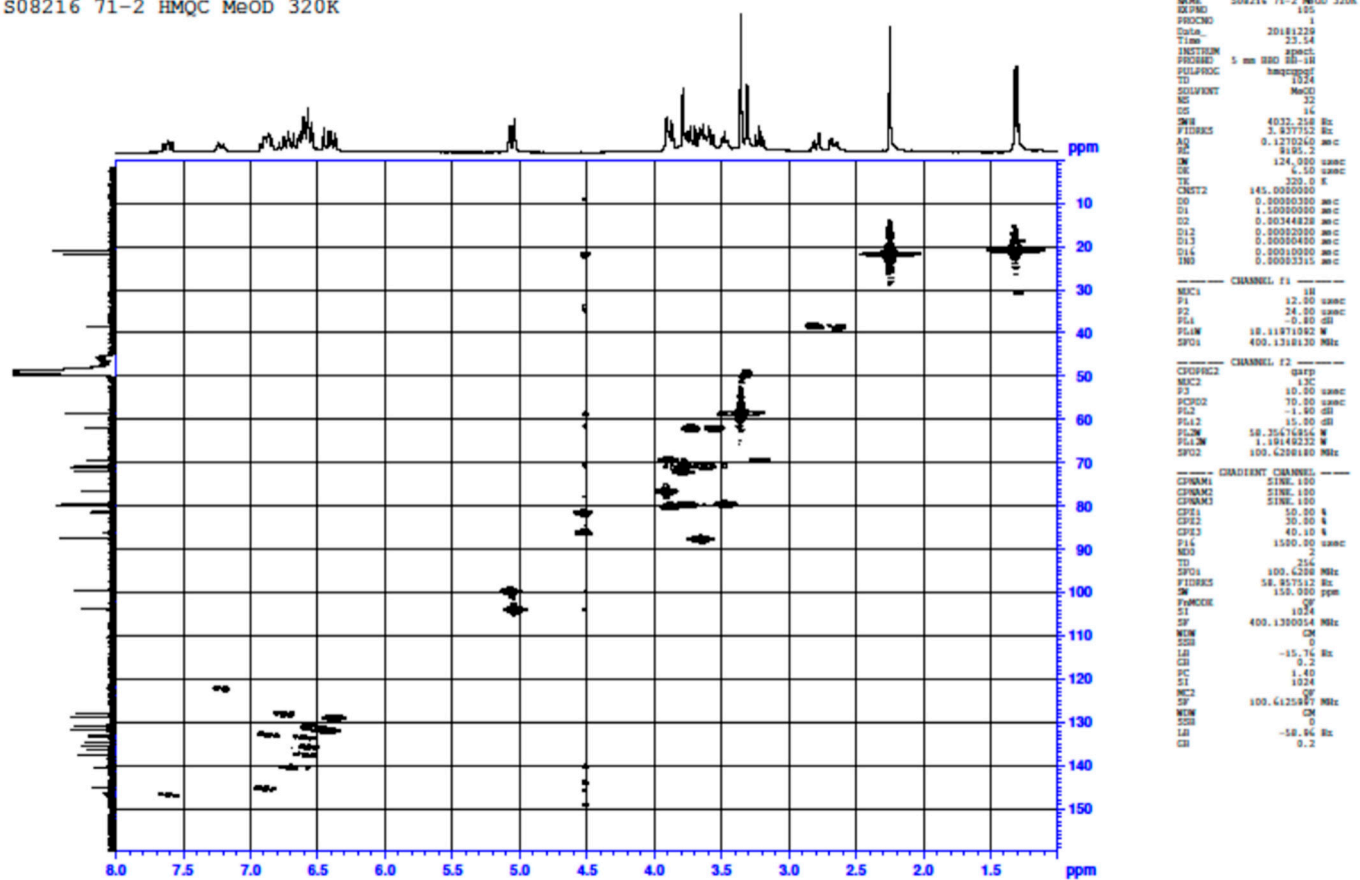

Figure S13. 2D  $^1\text{H}$ - $^{13}\text{C}$  HMQC spectrum of auranoside L (1) ( $\text{CD}_3\text{OD}$ , 320 K).

s08216 71-2 HMBC MeOD 320K

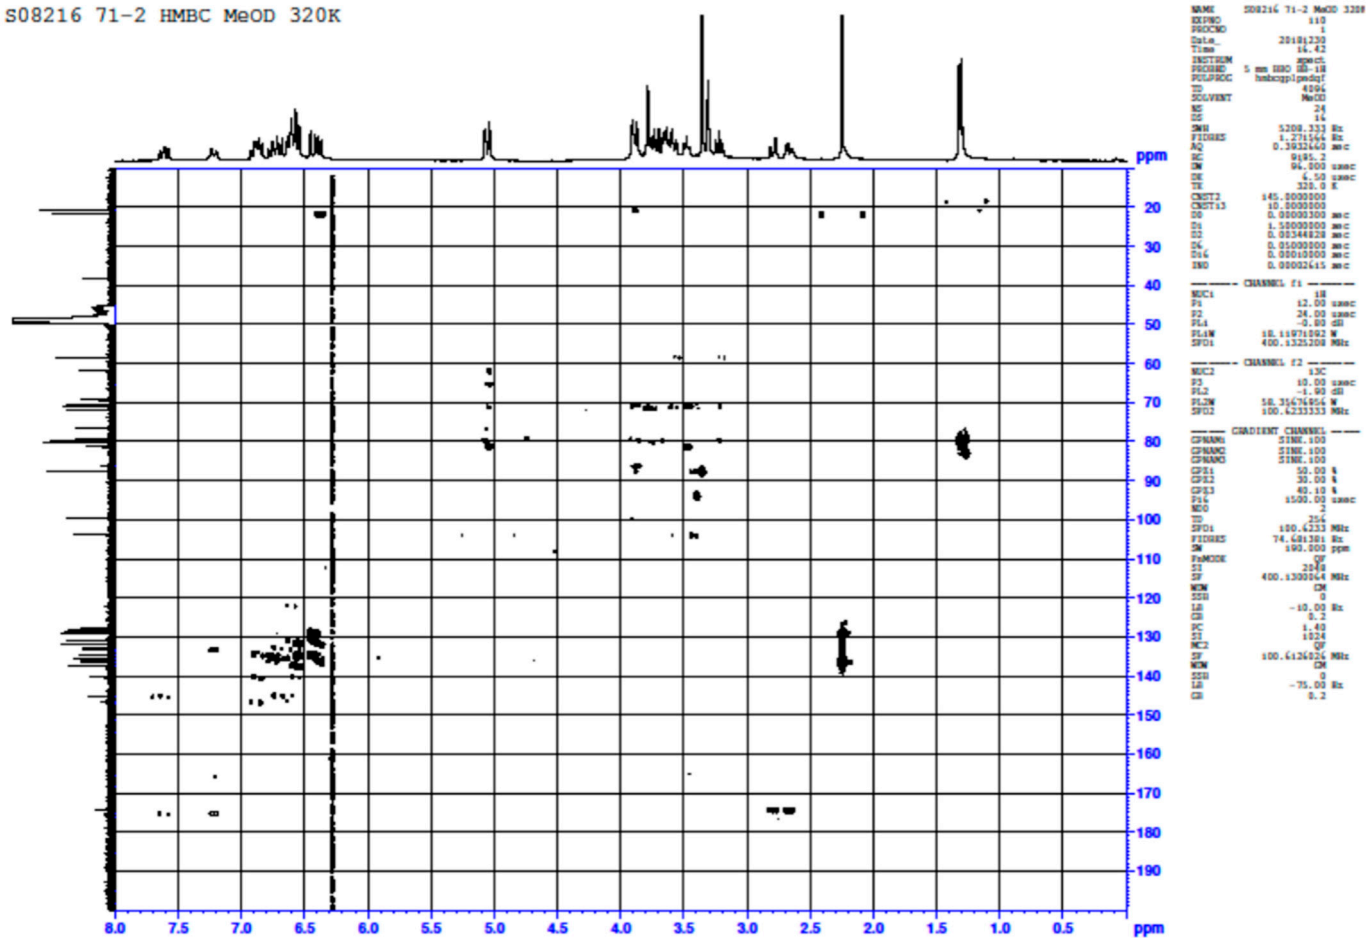

Figure S14. 2D  $^1\text{H}$ - $^{13}\text{C}$  HMBC spectrum of auranoside L (1) ( $\text{CD}_3\text{OD}$ , 320 K).



S08216 71-2 NOESY MeOD 320K

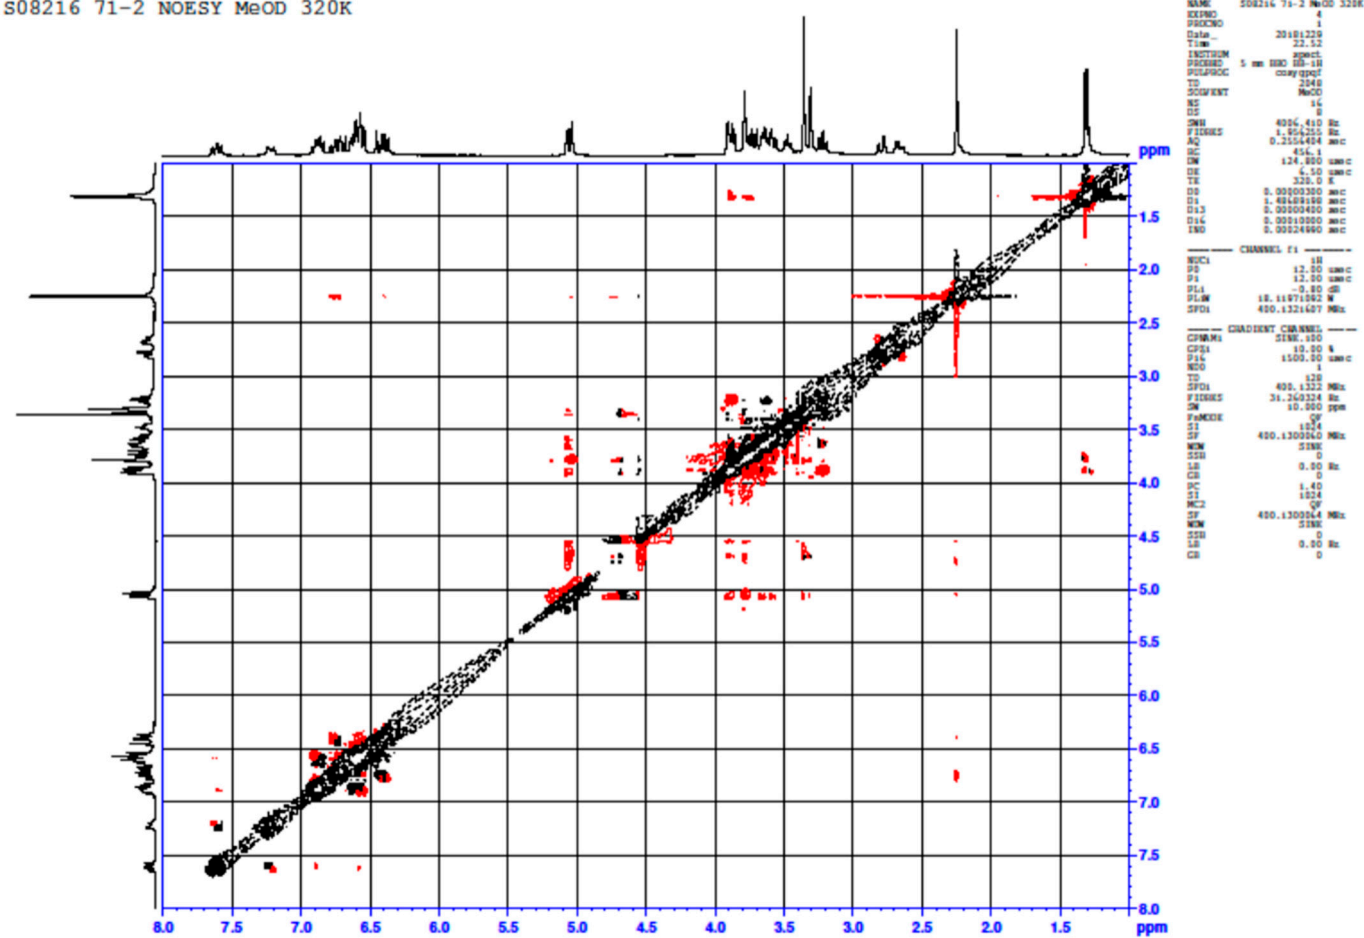

Figure S15. 2D  $^1\text{H}$ - $^1\text{H}$  NOESY spectrum of auranoside L (**1**) ( $\text{CD}_3\text{OD}$ , 320 K).

S08216 72-2 H NMR DMSO rt

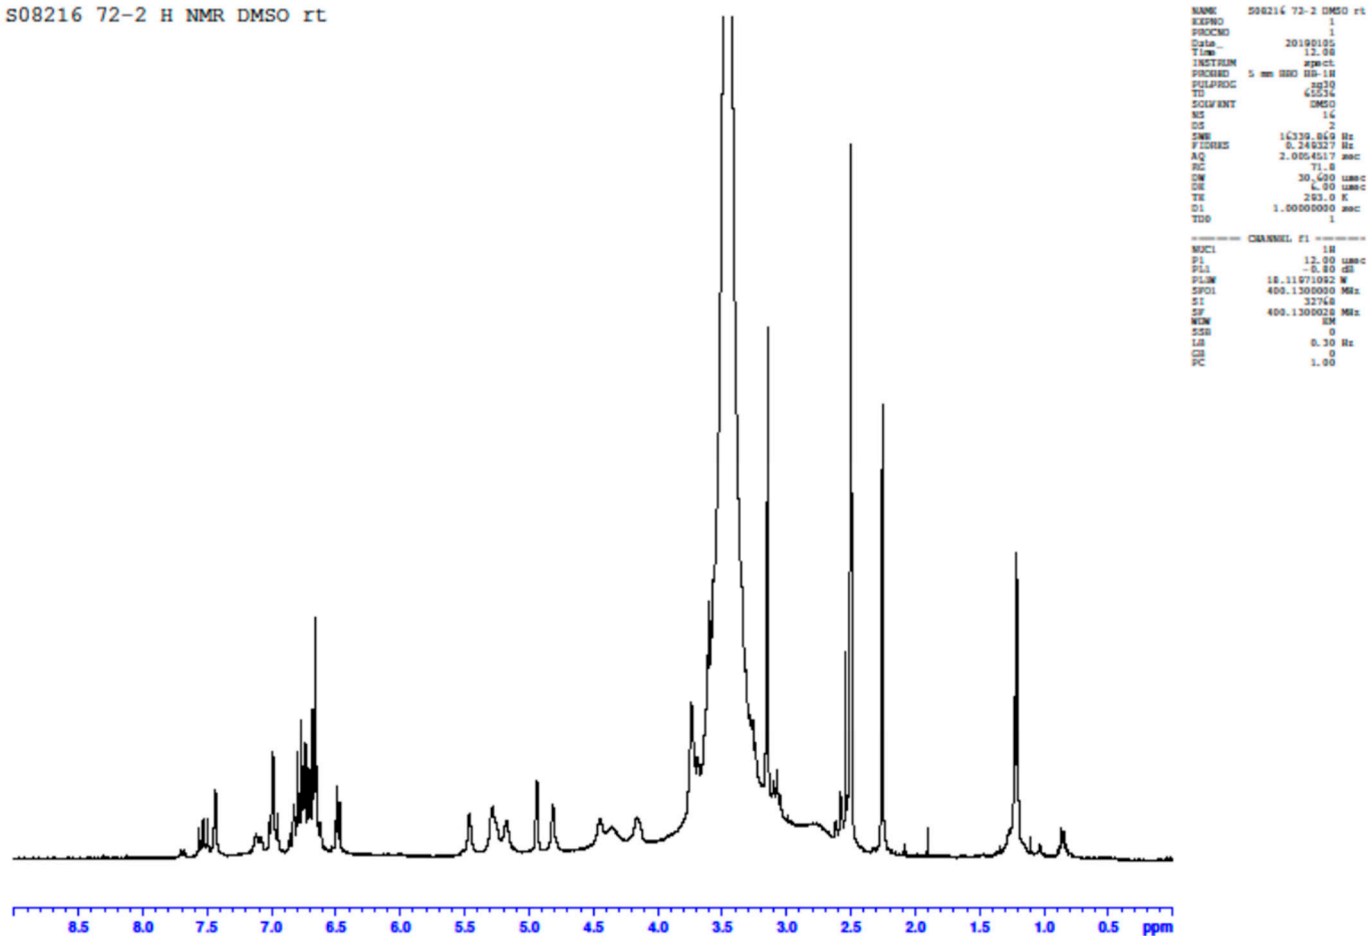

Figure S16. 1D  $^1\text{H}$  NMR spectrum of auranoside L (**1**) ( $\text{CD}_3\text{COCD}_3$ , 297 K).

S08216 71-2 NOESY DMSO

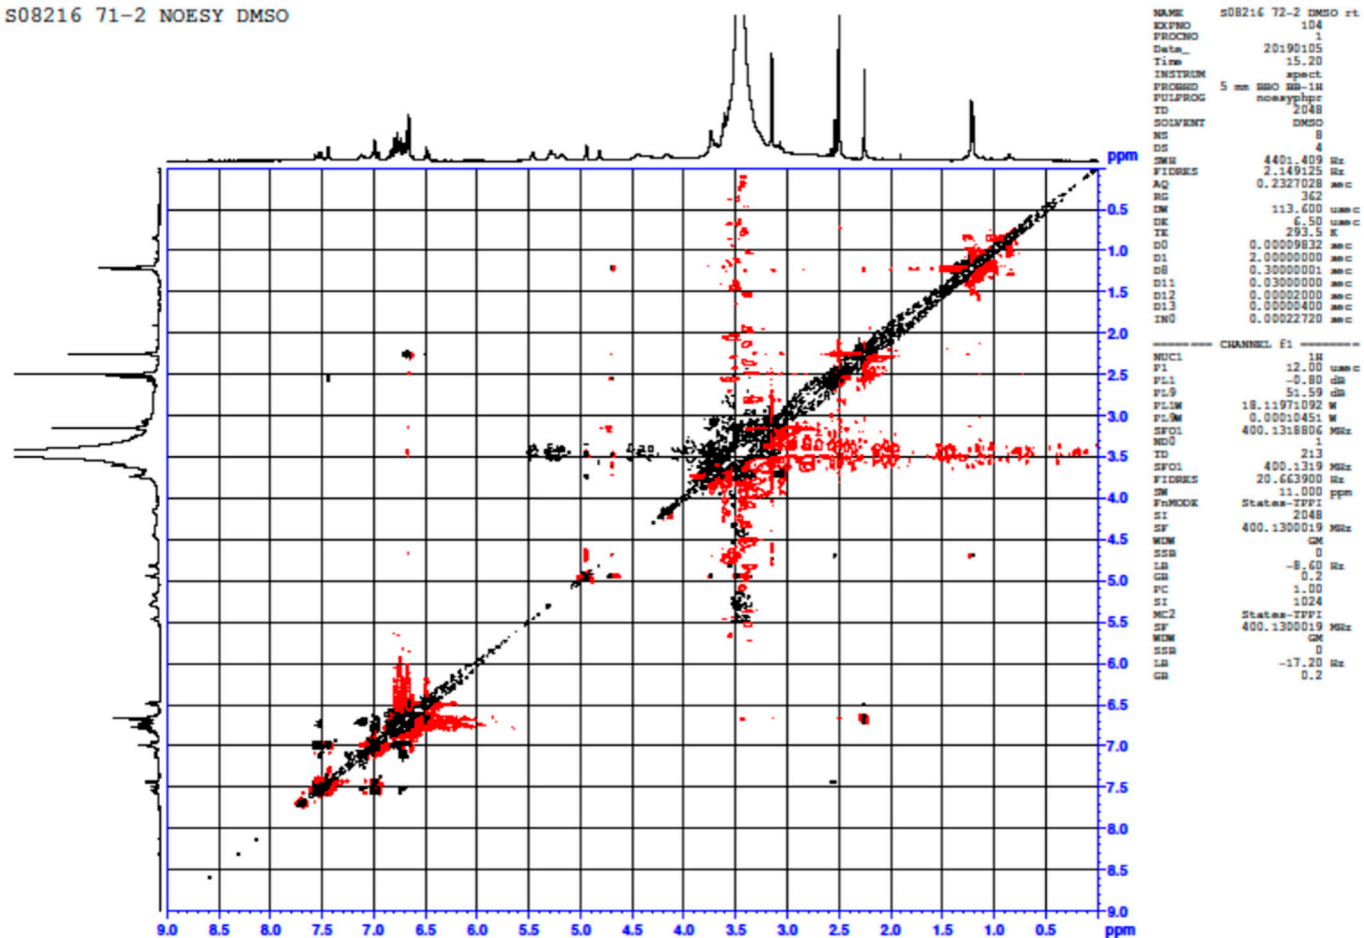

Figure S17. 2D  $^1\text{H}$ - $^1\text{H}$  NOESY spectrum of aurantoside L (**1**) ( $\text{CD}_3\text{COCD}_3$ , 297 K).

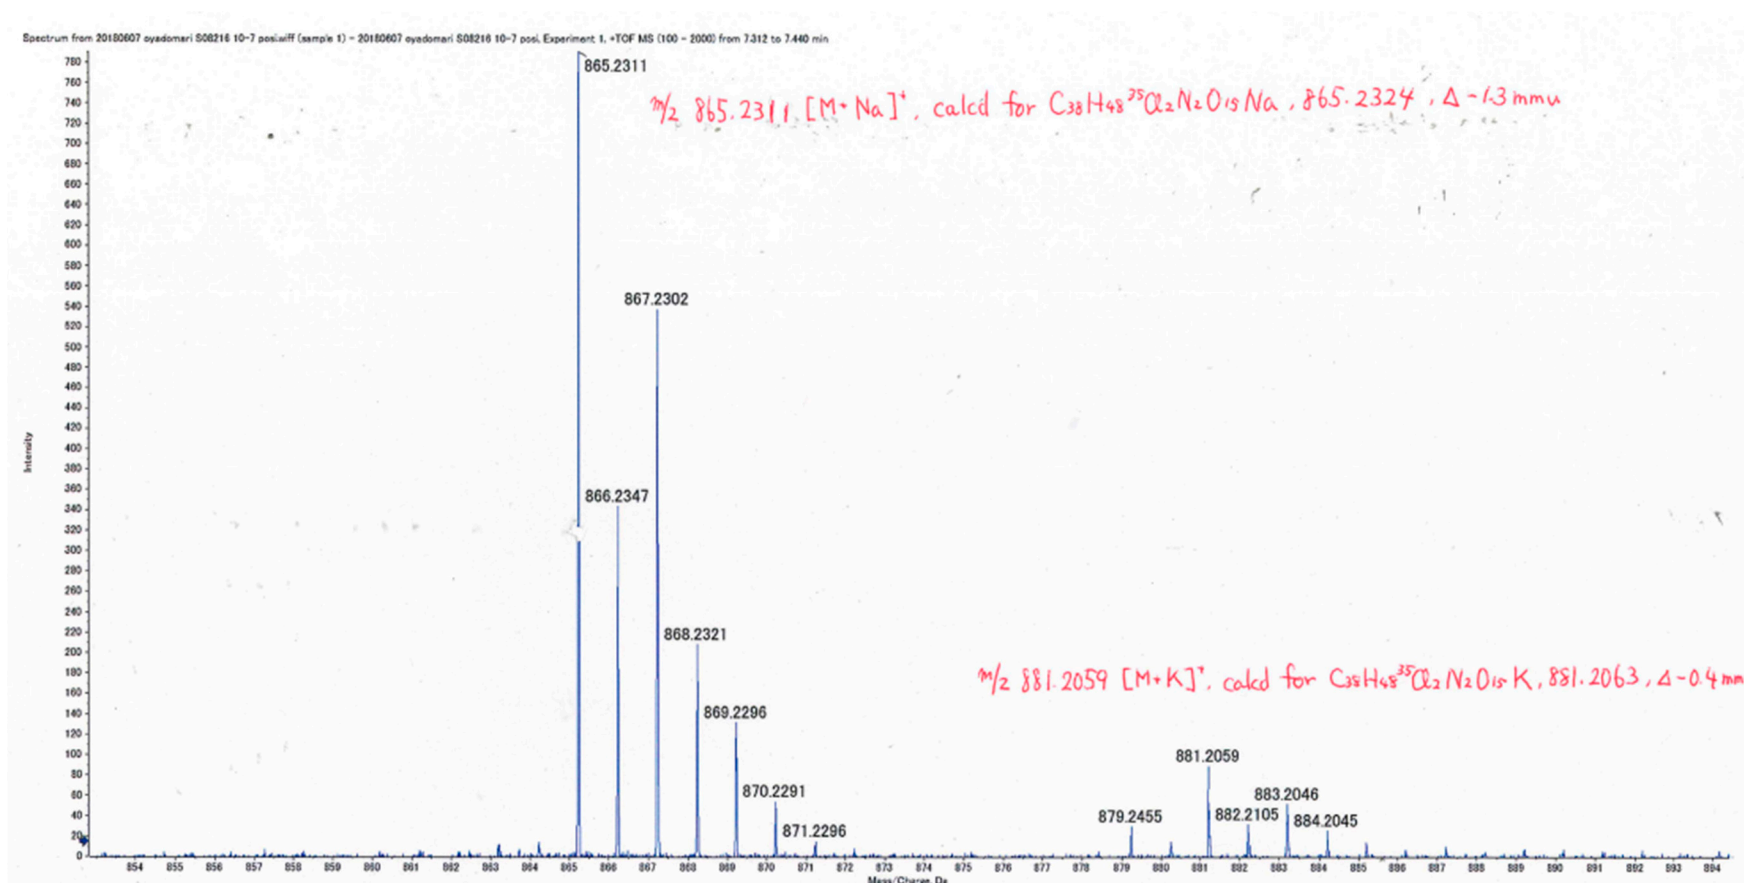

Figure S18. ESIMS of aurantioside L (**1**) (positive mode).

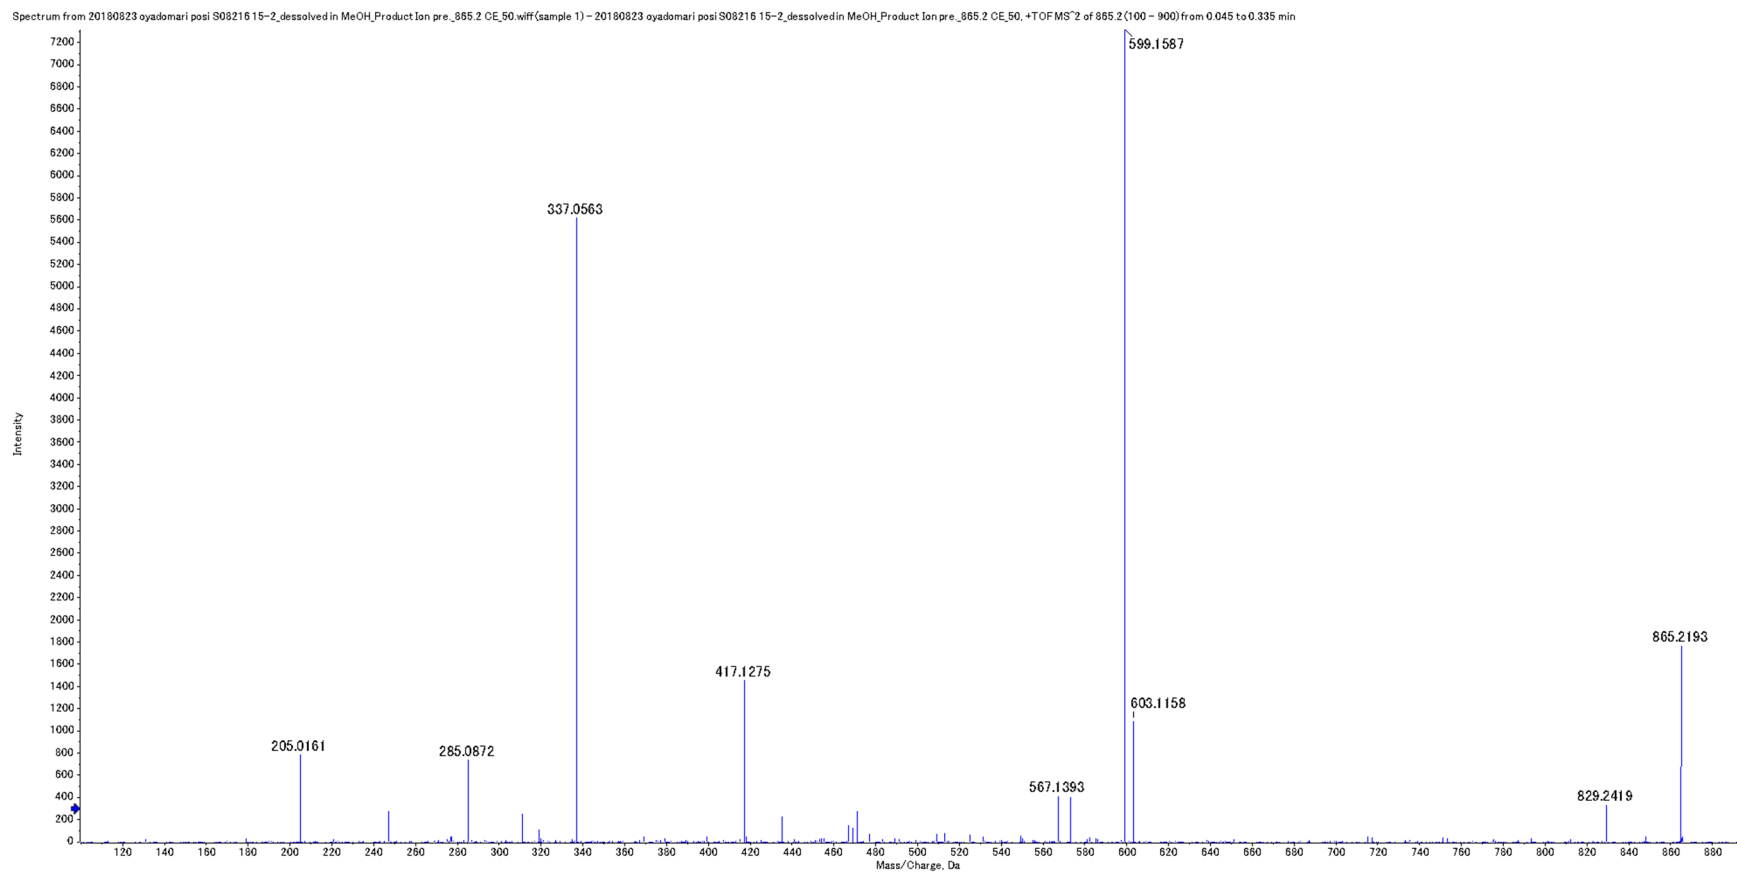

**Figure S19.** ESIMS/MS of aurantoside L (**1**) (positive mode, collision energy = 40 eV, precursor ion =  $m/z$  865.2).
